# Supplementary material for: MOF–Derived N–Doped C @ CoO/MoC Heterojunction Composite for Efficient Oxygen Reduction Reaction and Long-Life Zn–Air Battery
Source: MDPI journal article supplement (doi:10.3390/batteries9060306), 2023-06-02
Supplement: s1 [file s1]

## Supporting Information

### **MOF-derived N-doped C @ CoO/MoC Heterojunction Compo-site for Efficient Oxygen Reduction Reaction and Long-life Zn-air Battery**

Ruilian Yin,<sup>1, 3</sup> Suli Ma,<sup>1</sup> Jiaping Ying,<sup>1</sup> Zhentao Lu,<sup>4</sup> Xinxin Niu,<sup>2</sup> Jinxiu Feng,<sup>2</sup> Feng Xu,<sup>1</sup> Yifan Zheng,<sup>1</sup> Wenxian Liu<sup>2\*</sup> and Xiehong Cao<sup>2,3\*</sup>

<sup>1</sup> College of Chemical Engineering, Zhejiang University of Technology, Hangzhou 310014, China

<sup>2</sup> College of Materials Science and Engineering, Zhejiang University of Technology, 18 Chaowang Road, Hangzhou 310014, China

<sup>3</sup> Pinghu Institute of Advanced Materials, Zhejiang University of Technology, Jiaxing 314213, China

<sup>4</sup> College of Information Engineering, Zhejiang University of Technology, Hangzhou 310014, China

\*Corresponding author. E-mail: gcscaoxh@zjut.edu.cn and liuwx@zjut.edu.cn.

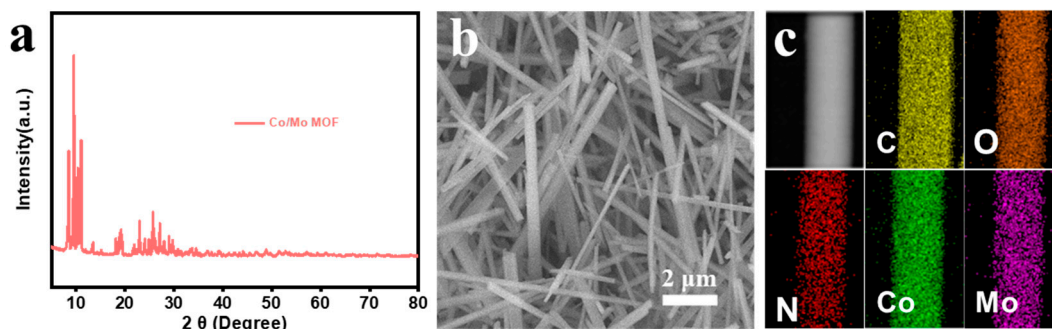

**Figure S1** (a) XRD patterns (b) SEM images and (c) EDX elemental mapping images of Co/Mo MOF.

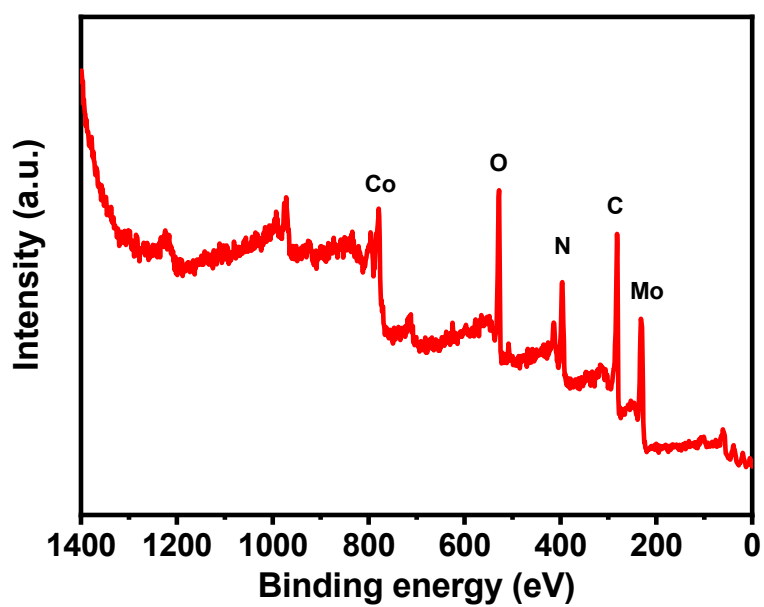

**Figure S2** Full-survey XPS spectra of the CoO/MoC@N/C heterojunction composite.

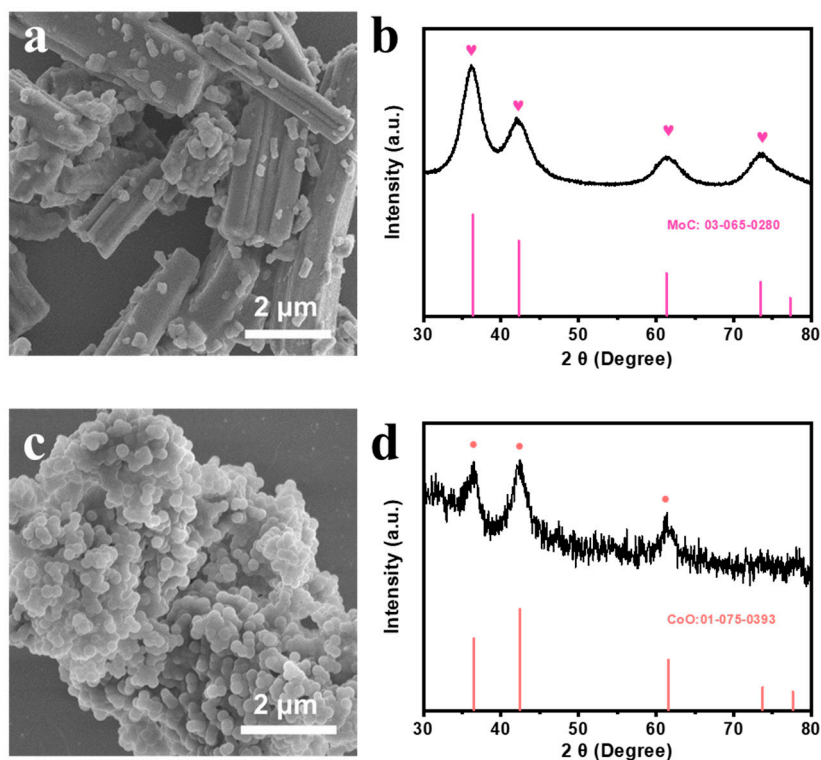

**Figure S3** SEM images and XRD patterns of (a-b) Mo MOF derived MoC and (c-d) Co MOF derived CoO.

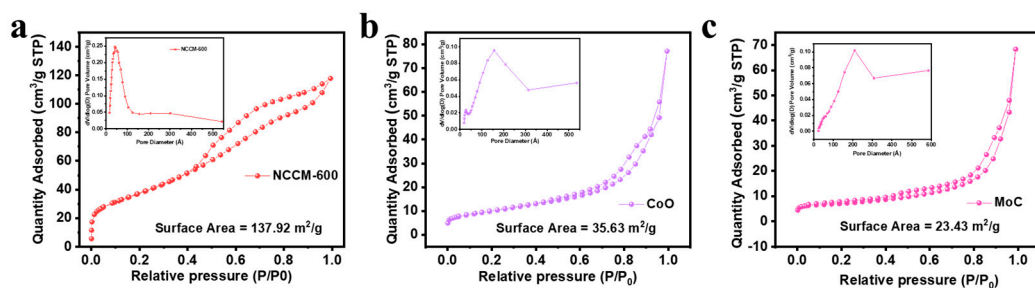

**Figure S4** Nitrogen adsorption-desorption isotherms and corresponding pore-size distribution of (a) NCCM-600 (b) Co MOF derived CoO and (c) Mo MOF derived MoC.

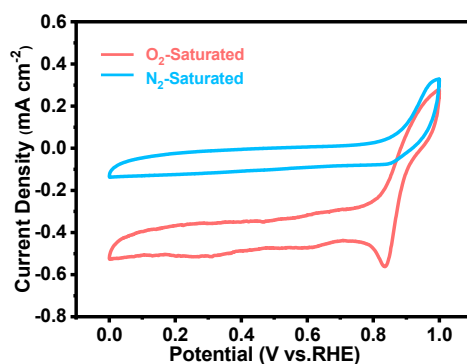

**Figure S5** (a) CV curves of NCCM-600 heterojunction composite in 0.1 m KOH saturated with O<sub>2</sub> and N<sub>2</sub>.

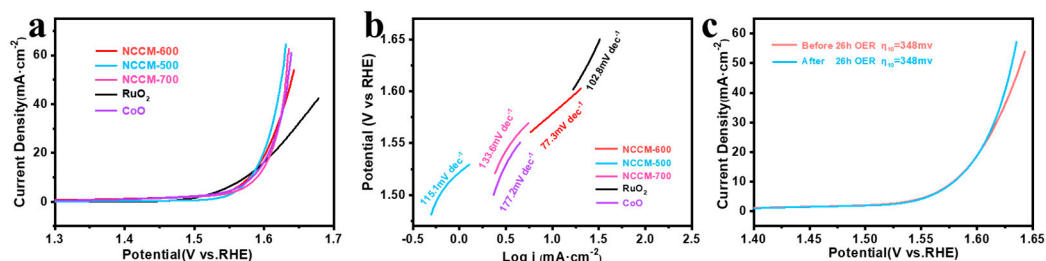

**Figure S6** (a) Linear sweep voltammetry (LSV) curves and (b) corresponding Tafel plots of NCCM-500, NCCM-600, NCCM-700, commercial RuO<sub>2</sub> and CoO (c) The stability of polarization curves of the NCCM-600.

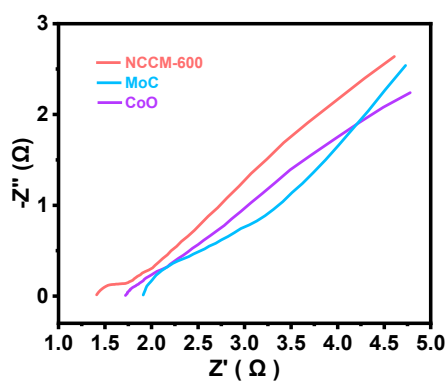

**Figure S7** Nyquist plots of MOF derived N-doped porous C@CoO/MoC heterojunction composite, MOF derived MoC and MOF derived CoO.

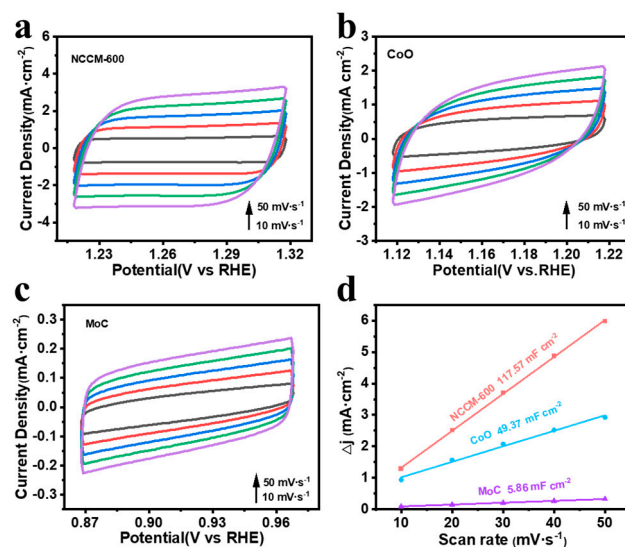

**Figure S8** CV curves of prepared (a) NCCM-600 (b) CoO (c) MoC in 1 M KOH at different scan rates. (d) Calculated  $C_{dl}$  for different samples, charging current density differences plotted against scan rate of the electrodes. The linear slope was used to represent the ECSA.

| Catalysts                                    | $E_{1/2}(\text{ORR})$<br>(V) | $E_{j=10}(\text{OER})$<br>(V) | $\Delta E = E_{j=10} - E_{1/2}$<br>(V) | References       |
|----------------------------------------------|------------------------------|-------------------------------|----------------------------------------|------------------|
| <b>NCCM-600</b>                              | <b>0.843</b>                 | <b>1.577</b>                  | <b>0.734</b>                           | <b>This work</b> |
| $\text{Co}_3\text{O}_4@\text{CoO}@\text{Co}$ | 0.79                         | 1.65                          | 0.86                                   | [1]              |
| In-CoO/CoP FNS                               | 0.81                         | 1.597                         | 0.787                                  | [2]              |
| NSC-CoO-900                                  | 0.83                         | 1.66                          | 0.83                                   | [3]              |
| CoO/hi-Mn <sub>3</sub> O <sub>4</sub>        | 0.70                         | 1.60                          | 0.90                                   | [4]              |
| CoO@NSNGs                                    | 0.82                         | 1.63                          | 0.81                                   | [5]              |
| MoC                                          | 0.72                         | -                             | -                                      | [6]              |
| CNF@Zn/CoNC                                  | 0.82                         | 1.70                          | 0.88                                   | [7]              |
| Ni-Fe-MoN NTs                                | 0.72                         | 1.53                          | 0.81                                   | [8]              |
| Mo-N/C@MoS <sub>2</sub>                      | 0.81                         | 1.62                          | 0.81                                   | [9]              |
| 2H-MoS <sub>2</sub>                          | 0.66                         | 1.73                          | 1.07                                   | [10]             |
| Co@IC/MoC@PC                                 | 0.875                        | 1.512                         | 0.635                                  | [11]             |
| P-CoO@PWC-2                                  | 0.84                         | 1.52                          | 0.68                                   | [12]             |

**Table S1** Comparison of the overpotentials for ORR (at  $E_{1/2}$ ) and OER at (10 mA cm<sup>-2</sup>) of the prepared CoO/MoC@N/C heterojunction composite and other reported bifunctional electrocatalysts.

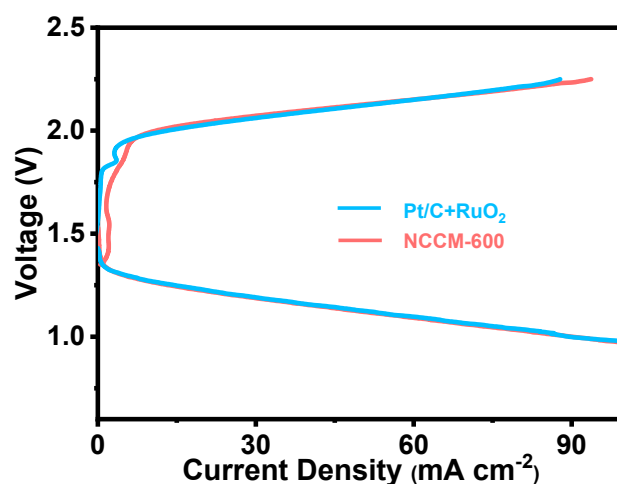

**Figure S9** Charge and discharge polarization curves of the fabricated Zn-air batteries.

## References

1. Chou, S. C., Tso, K. C., et al. Facile synthesis of Co<sub>3</sub>O<sub>4</sub>@ CoO@ Co gradient core@ shell nanoparticles and their applications for oxygen evolution and reduction in alkaline electrolytes. *Materials*, **2020**, 13(12): 2703.
2. Jin W, Chen J, Liu B, et al. Oxygen Vacancy-Rich In-Doped CoO/CoP Heterostructure as an Effective Air Cathode for Rechargeable Zn-Air Batteries[J]. *Small*, **2019**, 15(46): 1904210.
3. Chen S, Chen S, Zhang B, et al. Bifunctional oxygen electrocatalysis of N, S-codoped porous carbon with interspersed hollow CoO nanoparticles for rechargeable Zn-air batteries[J]. *ACS applied materials & interfaces*, **2019**, 11(18): 16720-16728.
4. Guo C, Zheng Y, Ran J, et al. Engineering high-energy interfacial structures for high-performance oxygen-involving electrocatalysis[J]. *Angewandte Chemie International Edition*, **2017**, 56(29): 8539-8543.
5. Zhang M, Han C, Cao W Q, et al. A nano-micro engineering nanofiber for electromagnetic absorber, green shielding and sensor[J]. *Nano-micro letters*, **2021**, 13(1): 1-12.
6. Defo C, Mishra A K, Yerima B P K, et al. Current conditions of groundwater resources development and related problems in the Republic of Cameroon, West Africa[J]. *European Water*, **2016**, 54: 43-68.
7. Zhao Y, Lai Q, Zhu J, et al. Controllable construction of core-shell polymer@ zeolitic imidazolate frameworks fiber derived heteroatom-doped carbon nanofiber network for efficient oxygen electrocatalysis[J]. *Small*, **2018**, 14(19): 1704207.
8. Tomon C, Sarawutanukul S, Duangdangchote S, et al. Photoactive Zn-air batteries using spinel-type cobalt oxide as a bifunctional photocatalyst at the air cathode[J]. *Chemical Communications*,

- 2019, 55(42): 5855-5858.
9. Sadighi Z, Liu J, Zhao L, et al. Metallic MoS<sub>2</sub> nanosheets: multifunctional electrocatalyst for the ORR, OER and Li-O<sub>2</sub> batteries[J]. *Nanoscale*, **2018**, 10(47): 22549-22559.
  10. Ouyang B, Artrith N, Lun Z, et al. Effect of Fluorination on Lithium Transport and Short - Range Order in Disordered - Rocksalt - Type Lithium - Ion Battery Cathodes[J]. *Advanced Energy Materials*, **2020**, 10(10): 1903240.
  11. Zhang L, Zhu Y, Nie Z, et al. Co/MoC nanoparticles embedded in carbon nanoboxes as robust trifunctional electrocatalysts for a Zn-air battery and water electrocatalysis[J]. *ACS nano*, **2021**, 15(8): 13399-13414.
  12. Liu H, Liu Y, Mehdi S, et al. Surface Phosphorus-Induced CoO Coupling to Monolithic Carbon for Efficient Air Electrode of Quasi-Solid-State Zn-Air Batteries[J]. *Advanced Science*, **2021**, 8(19), 2101314.
